# Supplementary material for: Investigation of the effects of estrogen on skeletal gene expression during zebrafish larval head development
Source: PeerJ. 2016 Mar 31;4:e1878. doi: 10.7717/peerj.1878 (PMC4824909; doi:10.7717/peerj.1878)
Supplement: Data S1 [file peerj-04-1878-s006.xlsx]

## Sheet: Sheet1
							Raw Ct values of the genes tested in 1st cDNA																																					Raw Ct values of the genes tested in 2nd cDNA
		Stage	Treatment	Tank No.	Replicate		ppia2	tbp	rpl8	actb1	tuba1	elfa	gapdh	mmp2	ogn	mmp9	sparc	sfrp1a	ets2	cfos	erf	ctsk	timp2a	esr1	rarab	spp1	err1	sox9a	igf1	sox9b	opg	rankl	col2a1a	shha	dlk1	shhb	bmp2a	bmp2b	ptch1	ptch2	smo	mmp13		ppia2	tbp	rpl8	rrbp1a	lman1	ssr1
		3dpf	Control	1	R1		14.0946	21.4351	15.6533	14.6969	18.958	15.0897	18.633	18.7459	21.9023	23.9683	16.076	19.801	22.5137	21.7775	20.8484	21.9085	21.8363	28.0136	20.7042	25.9119	20.9601	19.6311	23.2037	21.5312	24.3638	26.3072	15.876	22.1362	22.3713	22.7409	23.7292	22.5259	20.2026	20.23	21.0835	24.8312		13.8988	21.4457	15.0105	20.9006	20.7896	18.3608
		3dpf	Control	2	R2		14.4401	21.1774	15.2827	14.6706	19.9962	15.0051	19.4926	18.6102	21.4648	25.0499	15.9501	20.0034	22.2764	19.703	21.1392	21.9721	21.103	27.5724	20.4352	25.0515	20.8561	19.2139	22.6766	21.2939	24.306	26.1505	15.482	21.9111	21.8087	22.5472	23.6707	22.1013	20.1588	20.1796	21.508	25.5285		14.4233	21.4925	15.4316	20.9342	21.1738	18.5845
		3dpf	Control	3	R3		14.4554	21.639	15.7467	15.475	20.6651	16.0557	19.9936	18.7258	22.1934	24.405	16.3134	19.9007	23.0109	22.7094	20.7708	22.1715	21.4117	27.9422	20.3705	26.547	21.5846	19.4071	23.5065	21.1385	24.8555	26.6313	15.4682	22.3911	22.7821	22.9388	24.2596	23.0691	20.1959	20.0261	21.53	25.488		14.1156	21.356	15.2338	21.114	20.9632	18.5246
		3dpf	2μM E2	4	R1		13.8681	21.1658	14.9088	14.8764	19.3619	15.2141	19.5544	18.9028	22.2239	25.3732	16.0226	20.1013	23.3917	21.5383	21.2661	22.0342	22.0052	27.8764	20.731	25.6733	21.1499	19.8261	23.3662	21.7126	24.7234	26.6995	16.5572	21.9892	22.2679	22.2507	23.8519	22.3545	20.2079	20.4994	21.1006	25.199		13.7641	21.3948	14.8206	21.4175	20.9293	18.77
		3dpf	2μM E2	5	R2		14.1501	21.15	14.75	14.8753	20.0539	14.9674	19.2001	18.7964	21.6084	25.5418	16.0113	20.3498	22.8272	21.2407	21.1542	22.1375	21.0306	27.8013	20.6689	25.0025	20.962	19.4499	22.8613	21.5625	24.5365	26.6827	15.4465	22.0315	22.0626	22.4443	23.8001	22.2962	20.2038	20.3488	21.4081	25.4121		14.0503	21.4664	15.2166	21.6789	21.1154	18.9157
		3dpf	2μM E2	6	R3		13.9532	21.3272	14.7635	14.8656	20.8325	15.0378	19.0303	18.6715	21.3117	25.4186	15.8516	20.3507	23.3629	21.547	21.3066	21.9291	21.7754	27.9137	20.8492	24.5673	21.0917	20.0007	23.3394	21.5768	24.5149	26.22	15.9368	22.3557	22.3863	22.5664	23.8994	22.5258	20.3719	20.6989	21.4656	25.3758		13.9986	21.5486	14.9897	21.7972	21.1029	18.8342
		3dpf	5μM E2	7	R1		14.1162	20.9989	15.0164	14.6721	19.1992	14.9824	19.8001	18.9915	22.3074	25.6197	16.0815	20.3158	23.2397	22.4358	21.7885	21.9942	22.112	28.3354	20.8595	25.6734	20.9007	20.2487	23.4839	21.9689	24.6595	26.6028	17.0863	22.3293	22.2331	22.6614	24.0954	22.5243	20.8373	21.044	21.3518	25.2742		15.0566	22.8358	16.4894	22.8617	21.5508	19.5805
		3dpf	5μM E2	8	R2		15.4674	22.8266	16.6447	15.6371	21.1616	18.07	21.9687	19.8636	23.4085	27.4795	17.4864	21.5865	23.6767	22.4236	23.9023	22.7726	22.6202	29.2004	22.0827	26.9331	22.225	20.8128	24.6077	22.6671	25.0275	27.9448	18.9484	23.5531	22.904	23.7852	25.7072	23.0739		22.1372	22.6625	26.2415		13.7742	21.1467	14.9581	21.4617	20.6874	18.4911
		3dpf	5μM E2	9	R3		13.8006	21.1005	14.9	14.7484	20.2616	14.8067	19.0894	18.3398	21.0434	24.9711	15.7427	20.1712	22.5156	22.4371	20.9503	21.6554	20.8687	27.6805	19.9818	23.9697	20.4866	18.9937	22.5837	20.838	24.1267	26.0978	14.4075	22.0172	21.6485	22.3182	23.8172	22.1283	19.8913	20.2321	21.0452	24.8016		14.024	21.3927	15.0176	20.9771	20.9664	18.4124
		4dpf	Control	1	R1		14.3	21.4155	15.4439	14.7586	19.7206	15.3872	18.5123	19.2888	21.5714	24.6027	16.1372	20.4025	23.1206	22.527	21.0449	22.2199	22.051	27.9005	20.3739	25.1774		19.7118	23.6883	21.2693	24.5797		15.1977	21.8931	22.1822	22.675	23.7161	22.2148	20.0023	19.8939	21.3703	25.853		14.3174	21.589	15.2638	21.2562	21.3843	18.7744
		4dpf	Control	2	R2		15.1798	21.7948	15.9607	15.1636	21.3572	16.102	16.5007	18.8228	20.5548	24.2085	16.8358	21.0412	22.1623	18.8591	21.4908	22.2939	21.3265	27.9625	20.6371	24.0021	21.2778	20.2777	23.7686	21.78	23.858	26.3534	15.2646	22.538	21.7907	23.3839	23.78		20.0824	20.191	21.9146	25.6272		15.1905	21.9955	15.9383	21.784	21.7836	19.2023
		4dpf	Control	3	R3		14.4651	21.5016	15.5637	14.8186	20.5502	15.2284	17.4275	18.8465	20.7252	24.0371	16.3288	20.2595	22.5702	19.7405	21.201	22.1112	21.4607	27.9534	20.1829	24.2109	20.8831	19.9975	23.3747	21.7375	24.0542	26.3254	15.1171	21.9844	21.5932	22.786	23.2921	21.9691	19.7541	19.8323	21.4256	25.2301		14.1763	21.4023	15.1123	20.8945	21.0158	18.5432
		4dpf	2μM E2	4	R1		14.3993	21.5395	15.4796	14.9008	19.8304	15.297	19.2452	19.5521	22.0121	25.0716	16.9374	20.5098	23.3133	23.1599	21.3371	22.2383	22.0716	27.8817	20.4136	25.2926	21.1499	19.7975	24.1582	21.1207	24.8672	27.0007	15.6182	22.0421	22.4986	22.9627	23.8651	22.3298	19.8219	19.7913	21.1549	25.1426		14.4548	21.6239	15.3275	21.0024	21.1691	18.6089
		4dpf	2μM E2	5	R2		14.8836	21.5338	15.9434	14.898	20.1832	16.1352	19.3923	19.0991	21.6128	23.9629	17.1884	20.94	23.0433	22.3192	21.6253	22.4339	22.1136	27.9383	20.5778	24.9828	21.4148	19.8143	23.525	21.4399	24.6223	26.92	15.035	22.3382	21.8233	23.1164	23.9809	22.4158	19.9901	20.1193	21.806	25.6958		14.2127	21.5675	15.2489	20.7527	21.0635	18.5056
		4dpf	2μM E2	6	R3		14.6149	21.3899	15.5014	14.9131	21.0677	15.578	17.7511	18.9599	21.0851	24.2785	16.5823	20.56	22.4063	20.2518	21.4969	22.0016	21.3245	27.9619	20.3468	24.5956	21.0793	20.2313	23.026	21.9696	24.0559	26.547	15.2066	22.0577	21.812	22.9114	23.4265	22.0544	19.7558	19.9426	21.3885	24.6313		14.8786	21.8536	15.8429	21.2512	21.5486	18.9765
		4dpf	5μM E2	7	R1		14.1387	21.2222	15.1577	14.7713	19.8761	15.1149	17.7445	18.9644	21.2874	24.5862	16.3911	20.3998	22.5586	22.2943	21.169	21.8108	21.4366	27.9468	20.2799	24.2061	21.1703	20.1974	23.2366	21.6785	24.0412	26.4232	15.3906	21.9624	22.0195	22.9711	23.2744	22.049	19.8072	19.924	20.9186	24.5316		13.8562	21.2042	14.8292	21.1013	20.9971	18.4359
		4dpf	5μM E2	8	R2		15.1833	21.961	16.0899	15.4051	21.1094	16.4347	20.3095	19.4948	22.0786	25.6529	17.7669	21.4591	23.4325	23.2009	21.968	22.5768	22.2973	28.843	21.3156	25.1241		20.8403	23.6206	21.8712	24.8569	27.3403	15.3059	22.7061	22.4129	23.8327	24.3679	22.6748	20.7618	20.8591	22.1049	25.3987		14.9797	22.0484	15.7785	21.9934	21.9671	19.4038
		4dpf	5μM E2	9	R3		13.9498	21.0345	14.8614	14.3878	19.3676	14.5502	18.489	18.8393	20.9204	24.6258	15.988	20.2206	22.6097	21.9235	21.1263	21.8078	21.1695	27.7038	20.3218	23.8603	20.7848	19.6819	23.0171	21.2414	24.0648	26.5179	15.1363	21.6587	21.685	22.4843	23.1188	21.7668	19.5518	19.8649	20.7838	24.742		13.802	21.1487	14.9017	21.1428	21.0819	18.4204
		5dpf	Control	1	R1		15.05	22.091	16.1892	15.6769	21.4165	16.3889	18.0318	19.1203	20.5277	24.2793	16.7821	20.9987	22.7866	20.7308	21.996	22.7692	21.5038	27.8649	20.8569	22.4163	20.9478	20.5688	23.6224	21.951	24.3988	26.1689		22.8762	22.3308	23.7294	24.3197	22.8575	20.6081	20.7738	22.5484	26.1181		14.901	22.0743	15.6936	22.0642	22.0371	19.3972
		5dpf	Control	2	R2		14.7291	22.084	15.6998	15.3368	21.2655	14.9637	17.1459	18.9496		20.797	16.4467	21.0043	22.4696	21.8996	21.7232	22.5023	21.0903	27.6228	20.7901	22.0033	20.6839	20.4669	23.6813	21.4914	24.015	25.7656	15.2371	22.3089	22.0557	23.3096	23.9518	22.6003	20.2084	20.6328	22.0006	21.3316		15.1866	22.2227	16.2632	22.395	22.4191	19.7664
		5dpf	Control	3	R3		14.6495	21.6949	15.515	15.2121	21.3069	15.1813	17.0997	18.829	20.0101	23.7679	16.2705	20.7115	22.7133	21.8321	21.4293	22.4278	20.9158	27.5133	20.4526	22.0883	20.47	20.0473	23.4043	21.5638	23.9196	25.9473	14.9863	22.5757	21.7743	23.2603	23.7347	22.326	20.0975	20.4591	21.9071	25.6195		14.7791	21.9091	15.4601	21.7151	22.0591	19.3117
		5dpf	2μM E2	4	R1		14.7618	21.9688	15.6618	15.1518	21.3686	15.4151	17.5434	18.9114	20.084	24.3996	16.4698	21.1639	22.4906	22.6881	22.0141	22.4987		25.9065	20.9797	22.667	20.628	20.4408	23.3995	21.758	24.1308	25.92	15.5098	22.5248	22.0652	23.1591	24.0208	22.5834	20.4862	20.9592	22.0863	26.0087		14.7846	21.9565	15.7237	21.2988	21.5687	19.0004
		5dpf	2μM E2	5	R2		15.0857	21.9386	15.7	15.2179	21.6371	15.9167	18.5123	18.9243	20.6498	24.881	16.9663	21.3125	22.8619	22.3924	21.7165	22.6222	21.4389	26.3249	20.6713	23.4332	20.865	20.2413	23.3743	21.4881	24.3252	26.3487	14.8916	22.5587	22.014	23.4993	24.1862	22.6985	20.6033	20.7044	22.2543	26.5083		15.3909	21.9428	16.2882	21.6249	21.9889	19.3753
		5dpf	2μM E2	6	R3		14.8133	21.9562	15.7267	15.2655	22.0002	15.708	17.5894	18.9502	20.1811	23.5437	16.4929	20.9142	22.66	21.8647	21.8789	22.4423	21.5363	26.3414	20.7366	22.7067	20.5695	20.7954	23.4052	21.8076	24.1417	25.7313	15.3413	22.5852	22.2696	23.1761	23.94	22.6152	20.5689	20.7005	22.0597	25.3287		14.8793	22.0469	15.9056	21.6512	21.7181	19.1228
		5dpf	5μM E2	7	R1		14.71	21.7507	15.5941	15.015	20.7836	15.0479	18.1852	18.9985	20.5549	24.5536	16.5724	21.1286	22.7323	22.9703	21.773	22.288	21.3165	27.0171	20.7953	23.0836	20.8325	20.2845	23.5011	21.6967	24.2781	26.6477	15.0373	22.5634		23.2862	24.0895	22.7401	20.5076	20.8724	21.8871			14.591	21.7957	15.6007	21.5235	21.7004	19.1393
		5dpf	5μM E2	8	R2		15.0887	22.0668	16.0344	15.4005	21.1976	15.8925	18.5398	19.1175	20.6063	24.7224	16.946	21.1945	22.9012	21.7416	22.0992	22.7301	21.0831	26.8921	20.7275	23.1102	20.8849	20.4084	23.4163	21.7389	24.4277	26.3281	15.1012	22.65		23.5409	24.3296	22.8911	20.6868	21.0021	22.3395	26.1659		15.0916	22.2728	16.1595	21.9988	22.064	19.4892
		5dpf	5μM E2	9	R3		15.2243	21.9995	15.7958	15.4249	22.2642	15.8201	15.9681	19.2379	20.4972	23.4767	17.0822	21.1024	21.7825	19.2063	21.8514	22.5749	21.2395	26.5693	20.8533	21.8805	20.7965	20.7137	23.8883	21.9768	24.1484	25.9662	15.7248	23.0196	22.153	24.0273	24.1215	22.7709	20.5984	20.9995	22.5599	24.3237		15.2724	22.265	15.9811	21.9591	22.0586	19.4726
		6dpf	Control	1	R1		14.8139	21.6144	15.9502	15.7378	21.2017	15.8477	17.2994	18.5972	20.2397	24.4351	16.7297	20.7455	22.4796	21.5071	21.6763	22.6714	20.9078	27.3782	20.4605	21.2282	20.8278	20.3039	23.2131	21.3157	23.6138	25.6915	15.6882	22.8282	21.8055	23.2388	23.8425	22.1343	20.0632	20.617	22.0723	26.2338		15.3833	21.729	16.0405	22.4197	22.1724	19.6644
		6dpf	Control	2	R2		15.0629	21.9168	16.0407	15.8561	21.9952	15.5161	17.3337	18.7929	20.039	23.2707	16.9255	20.9881	22.0474	20.3824	21.5753	22.5184	21.2302	27.0862	20.5125	21.2278	20.5421	19.8191	23.6709	21.2713	23.4157	25.4695	15.691	22.807	21.8526	23.5711	23.9226	22.3639	20.1895	20.6409	22.2025	24.6371		15.5442	22.008	15.9883	22.5095	22.1275	19.6397
		6dpf	Control	3	R3		14.8255	21.7575	15.6895	15.5988	21.8496	15.3276	17.2395	18.815	20.2062	24.3848	16.7625	20.8949	22.6568	22.5976	21.6641	22.9362	21.2081	27.2861	20.3952	22.0318	20.5267	20.103	23.3589	21.3731	23.782	25.5308	15.2886	22.65	21.6658	23.2906	23.7436	22.2268	20.0128	20.4806	21.8094	25.7058		15.338	21.8734	16.254	22.5912	22.1855	19.7948
		6dpf	2μM E2	4	R1		14.6047	21.6549	15.4887	15.5207	21.2209	15.1207	17.3364	18.3781	19.8608	23.8309		20.7381	22.018	20.0649	21.3216	22.4515	20.6279	24.0322	20.3824	21.1684	20.4447	19.7871	23.1292	20.9792	23.4449	25.2646	15.2225	22.6807	21.7886	23.1098	23.9108	21.899	20.264	20.5819	21.8168	25.1373		15.2957	22.0085	15.8763	21.1528	21.2684	19.0173
		6dpf	2μM E2	5	R2		14.5048	21.8014	15.5616	15.5721	21.7092	15.256	16.8335	18.317	19.9218	23.5629	16.4605	20.7711	21.8873	20.5738	21.1097	22.4234	20.2163	23.7508	20.4128	21.141	20.6599	19.2663	23.3991	20.8441	23.3842	25.3017	15.3353	22.7792	21.7795	23.4749	23.8051	22.0881	20.2087	20.6097	21.9846	24.7662		15.2836	21.7331	15.7929	21.076	21.2066	18.683
		6dpf	2μM E2	6	R3		14.7155	21.7511	15.4831	15.4728	22.2119	15.1464	16.9393	18.5612	19.9159	22.9213	16.7904	20.7602	21.8445	21.7697	21.5112	22.2719	20.9705	23.9967	20.4947	21.8533	20.6149	19.8042	23.4414	21.4447	23.3759	25.5875	15.3434	22.7758	21.8443	23.5987	23.9176	22.2305	20.1916	20.7036		23.6857		15.3201	22.1016	15.9662	21.1002	20.9799	18.7874
		6dpf	5μM E2	7	R1		14.5548	21.3342	15.7561	15.3667	21.209	15.0006	17.1637	18.2815	19.6755	23.6381	16.2469	20.5487	21.8093	19.9358	21.1924	22.0455	20.2017	25.723	20.5466	21.117	20.4225	19.6172	23.1014	21.014	23.3897	25.4285	15.1647	22.5374	21.5799	23.0695	23.5345	21.985	20.1454	20.6023	21.7472	24.4822		15.4743	21.9912	16.0986	21.7834	21.848	19.3925
		6dpf	5μM E2	8	R2		14.8885	21.9571	15.6705	15.3296	22.0779	15.5515	17.2596	18.5625	19.9116	21.4899	16.9354	20.864	21.4245	20.913	21.4798	22.2525	20.471	25.3632	20.7924	21.645	20.6382	19.8407	23.625	21.052	22.9097	25.0624	15.624	22.9389	22.0063	23.7761	23.9024	22.6698	20.3163	20.871	22.3097	22.6135		15.2283	21.6945	15.7631	21.8133	21.6837	19.1519
		6dpf	5μM E2	9	R3		14.5263	21.5871	15.3778	15.3472	21.4542	14.9301	16.956	18.4186	20.1167	23.6925	16.5351	20.8039	21.9819	20.1695	21.3704	22.5237	20.149	25.4222	20.5475	21.1786	20.4582	19.3231	23.0604	20.8292	23.2243	25.0858	15.3573	22.2909	21.4179	23.1886	23.3193	21.9621	20.0007	20.4997	21.6512	24.3273		15.1855	21.7378	15.7364	21.9834	21.7227	19.2358
														mmp2	ogn	mmp9	sparc	sfrp1a	ets2	cfos	erf	ctsk	timp2a	esr1	rarab	spp1	err1	sox9a	igf1	sox9b	opg	rankl	col2a1a	shha	dlk1	shhb	bmp2a	bmp2b	ptch1	ptch2	smo	mmp13
		7dpf	Control	1	R1		15.1227	22.1027	16.4215	17.1792	22.3713	17.2711	17.1903	19.2164	20.8117	23.9562	17.8237	21.4811	22.556	19.705	21.7634	23.2344	21.0414	26.9691	20.6677	21.4658	21.3096	20.8972		22.2451	23.8683	25.3984	16.5988	23.0619	21.7693	23.7597	24.2027	22.6333	20.5941	20.5974	22.457	25.7851		15.0502	22.0541	15.9735	23.0588	22.2873	19.9713
		7dpf	Control	2	R2		15.1995	22.0861	16.3595	16.2348	22.6087	16.2275	17.3461	19.0965	20.6718	23.2033	17.8414	21.442	22.0718	21.451	21.7102	22.7003	20.9851	27.1393	20.4844	21.4191	21.1693	19.903	23.5148	21.5737	23.6895	25.5032	16.2231	22.7998	21.7202	23.7723	24.1371	22.3524	20.1289	20.5099	22.399	24.6483		15.0273	22.1207	15.7612	23.001	22.4838	19.8257
		7dpf	Control	3	R3		15.0059	21.961	15.7997	16.2057	22.232	15.3569	16.3976	19.0028	20.5645	23.825	17.3407	21.2546	21.9697	21.4407	21.4405	22.8649	20.6501	26.8627	20.4765	20.6413	20.8525	19.9184	23.6934	21.3641	23.6506	25.1687	16.4602	22.6734	21.3208	23.5854	23.7251	22.4479	20.2938	20.2249	22.0317	25.6443		15.1977	22.0604	16.1761	23.1074	22.4872	19.9908
		7dpf	2μM E2	4	R1		14.4856	21.6387	15.5354	15.9974	21.2605	15.1531	16.8022	19.1085	19.9454	24.0616	16.989	21.1369	21.9612	21.176	21.4979	22.884	20.9089	23.5217	20.6811	21.4565	20.8917	19.6612	23.3852	21.5656	23.5336	25.1329	15.6311	22.6776	21.991	23.3076	23.6625	22.3953	20.205	20.552	21.8054	25.0818		14.3003	21.6183	15.1408	20.7366	20.3601	18.3923
		7dpf	2μM E2	5	R2		14.2265	21.6363	15.0317	15.099	22.4753	14.5334	16.0257	18.8969	19.8406		16.9354	21.2385	20.5806	21.261	21.2287	21.1597	20.6714	23.2702	20.5032	21.0022	20.6954	19.5699	23.4361	21.1809	22.7137	24.9964	16.104	22.4378	21.6924	23.178	23.4931	22.0292	19.9532	20.2604	21.77	22.0147		14.1894	21.6143	15.0304	20.6235	20.6064	18.3398
		7dpf	2μM E2	6	R3		14.2177	21.4752	14.9231	15.5193	22.3512	14.4416	16.3366	18.8333	19.781	23.7801	16.4741	21.0686	22.0458	22.4257	21.6627	22.5001	20.7704	23.0217	20.556	21.311	20.5584	19.8618	23.1772	21.1661	23.3676	24.7042	15.7885	22.439	21.614	23.0292	23.2554	22.007	19.8616	20.3123	21.5783	24.9245		14.5111	21.658	15.384	20.8563	20.7105	18.5918
		7dpf	5μM E2	7	R1		14.8941	21.925	15.9697	15.6419	21.5575	15.9318	17.4568	18.8503	20.2978	24.0831	16.8843	20.8966	22.5441	21.921	21.7672	22.4164	20.6874	26.1248	20.4716	21.3911	20.828	19.8426	23.455	21.4874	23.9977	25.4826	15.3448	22.3855	21.9791	23.0384	23.7012	22.3195	20.0533	20.6569	21.7038	24.772		14.9945	21.9436	15.9907	22.4036	21.6096	19.4893
		7dpf	5μM E2	8	R2		15.2643	22.0482	15.8435	16.0849	22.7857	15.3423	17.1067	19.138	20.5641	23.6699	17.4765	21.6602	22.171	20.4024	21.7587	22.8815	20.8772	25.8381	20.5702	20.9603	20.8278	19.5778	23.4167	21.315	23.8089	25.5299	16.0421	22.6982	21.9268	23.6923	23.9268	22.4517	20.1683	20.7691	22.1008	24.9948		15.2531	22.2096	15.9335	22.1201	21.7911	19.4922
		7dpf	5μM E2	9	R3		15.111	22.1682	15.826	15.8093	22.9022	15.6414	17.1756	19.1638	20.6171	21.5958	17.796	21.6985	21.6752	21.7064	21.9365	22.272	20.9352	25.3384	20.7663	21.6866	21.0088	20.0481	23.6428	21.588	23.5113	25.2903	16.4609	22.8223	21.9783	23.872	24.0002	22.4663	20.1072	20.6704	22.1569	22.5751		15.3154	22.109	15.8846	22.2236	21.8454	19.5335
[truncated: 8 more columns]
