# Supplementary material for: Investigation of the effects of estrogen on skeletal gene expression during zebrafish larval head development
Source: PeerJ. 2016 Mar 31;4:e1878. doi: 10.7717/peerj.1878 (PMC4824909; doi:10.7717/peerj.1878)
Supplement: Table S1 [file peerj-04-1878-s004.xlsx]

## Sheet: Table S1
	qPCR Primer sequences and information about candidate reference genes.
	Gene	Description	Primer Sequence (5’- 3’)	Product Size (bp)	Efficiency (E %)	R2 *	Melting Temperature (°C)	Accession ID
	actb1	actin beta 1	F- CGAGCAGGAGATGGGAACC	102	93.8	0.997	78.4 ± 0.1	NM_131031
			R- CAACGGAAACGCTCATTGC
	efl1α	elongation factor 1 alpha	F- CTTCTCAGGCTGACTGTGC	258	101.6	0.996	85.9 ± 0.3	AY422992
			R- CCGCTAGCATTACCCTCC
	gapdh	glyceraldehyde-3-phosphate dehydrogenase	F- GTGGAGTCTACTGGTGTCTTC	173	94.5	0.998	81.1 ± 0.1	NM_001115114
			R- GTGCAGGAGGCATTGCTTACA
	ppia2	peptidylprolyl isomerase Aa	F- GGGTGGTAATGGAGCTGAGA	179	92.8	0.989	82.15 ± 0.1	AY391452
			R- AATGGACTTGCCACCAGTTC
	rpl8	ribosomal protein L8	F- CCGAGACCAAGAAATCCAGAG	91	96.3	0.994	77.66 ± 0.1	NM_200713
			R- CCAGCAACAACACCAACAAC
	tuba1	tubulin, alpha 1a	F- CCTGCTGGGAACTGTATTGT	308	91.5	0.99	86.76 ± 0.6	NM_001190982
			R- TCAATGAGTTCCTTGCCAAT
	tbp	TATA box binding protein	F- CGGTGGATCCTGCGAATTA	101	91.9	0.991	79.25 ± 0.1	NM_200096
			R- TGACAGGTTATGAAGCAAAACAACA
	(*) R2, correlation coefficient of the slope of the standard curve.
	qPCR Primer sequences and information about candidate target genes.
	Gene	Description	Primer Sequence (5’- 3’)	Product Size (bp)	Efficiency (E %)	R2 *	Melting Temperature (°C)	Accession ID
	alx4	homeobox protein Aristaless-like 4	F-AAGTGGCGGAAGAGAGAGCG	119	97.3	0.989	78.26 ± 0.2	NM_001089357
			R-GAAGGGTTCTGAATCTGAGCGTAGT
	bmp2a	bone morphogenetic protein 2a	F- GCTGTGGTTCCTCAATACATGCTGG	172	95.5	0.993	82.16 ± 0.2	NM_131359
			R- TGGAGCTGGACGGATCTTCTGTAG
	bmp2b	bone morphogenetic protein 2b	F- GAGACGACGGGAACGCAGA	147	95.3	0.998	85.02 ± 0.3	NM_131360
			R- GTCGGTCGATCTCGGGAATGAG
	col2a1a	collagen type II, alpha 1 (cartilage collagen)	F- GATGTGGAGATCAGAGCAGAGGG	138	91.8	0.987	81.3 ± 0.3	NM_131292
			R- CATGATGGGCAGTCTGGATGTCT
	ctsk	cathepsin k	F- CTATAAAGAGATTCCTCAGGGTAACGA	68	96.3	0.994	80.85 ± 0.1	BC092901
			R- ACACGGGTCCCACATTGG
	dlk1	delta-like 1 homolog (Drosophila)	F- AGGAGGACGAGGACACGTCTG	141	91.5	0.999	81.64 ± 0.1	XM_005173564
			R- GAGGAGCTAGATGTGTTGAAGGAGG
	erf	Ets2 repressor factor	F- GAATTACGACAAGCTCAGTCGAG	178	97.9	0.998	78.67 ± 0.1	NM_001044927
			R- GACAGGTGGAGCACTTTGTG
	esrra	estrogen-related receptor 1	F- CTGGTGTGTGGAGATGTGGCA	122	95.4	0.998	82.03 ± 0.4	NM_212955
			R- TCATTAGAGGCAGGACAGCTGT
	esr1	estrogen receptor 1	F- ACTGTGGCTCGATTTCGGAGT	110	96.7	0.999	79.9 ± 0.8	NM_152959
			R- TCCACTGGACTGGAGCAGAATG
	ets2	V-Ets erythroblastosis virus E26 oncogene homolog 2	F- GATGATGAGAGGCTGTGTGGAG	119	89.5	0.994	83.06 ± 0.1	NM_001023580
			R- GCAGGAGACTACTGTGAGGATT
	mmp13	matrix metallopeptidase 13	F- AGACCAGGACACACTCGCAGAG	133	102.6	0.999	81.68 ± 0.1	NM_001290479
			R- CTGCTGCATCTCCTTGAGCCT
	mmp2	matrix metallopeptidase 2	F- CTGGGAACAAGTTCTGGAGATACA	156	90.4	0.999	77.7 ± 0.1	NM_198067
			R- GTGAGTCTTTGAAGAAGTAGCTGTG
	mmp9	matrix metallopeptidase 9	F- CAGAGAGGAAAAGGCAAGGTG	146	107.6	0.998	78.9 ± 0.2	NM_213123
			R- AGGAATACATCATGTGAATCAATGGG
	opg	osteoclastogenesis inhibitory factor (osteoprotegerin)	F- GTCAAAACCGCTGGAACGCC	132	94.5	0.998	79.05 ± 0.2	XM_002665433
			R- CAGCAGATGCTCTTCCCCCTG
	pbx1a	pre-B-cell leukemia homeobox 1 isoform A	F-GGACGACGAGGGAAGAAAACAGG	147	102.2	0.999	80.33 ± 0.2	NM_131614
			R-TCACACAGGACGTTGAACAGAGC
	pbx1b	pre-B-cell leukemia homeobox 1 isoform B	F-GCCAAACTCTCACAGATCCGCC	70	104.6	0.998	80.54 ± 0.1	NM_001083853.1
			R-GCCAAACTCTCACAGATCCGCC
	ptch1	patched 1	F- GGAGAAACTCTGGGTAGAAGTGGG	119	95.5	0.998	79.69 ± 0.6	NM_001305542
			R- CCTGACGAGGCGTCTGTATCATG
	ptch2	patched 2	F- TTGGGTTGCGGGTCGCTG	133	93.6	0.998	80.19 ± 0.1	NM_130988
			R- AGCATCTGTGAGGTGAACACTGACT
	rankl	receptor activator of nuclear factor kappa-B ligand	F- CTCACCTTCCAATCAAGACGCCC	81	96.8	0.966	81.36 ± 0.1	XM_002663351
			R- CTTTCATGCCATCCCAGGCTATCT
	runx2b	runt-related transcription factor 2b	F-GAAGCGGAAGAGGGAAGAGC	83	97.3	0.988	77.56 ± 0.2	NM_212862
			R-AATGGCTCTGTGGTAAGTGGC
	rarab	retinoic acid receptor alpha b	F- TCACCCGAAACCGCTGCCA	177	96.3	0.994	81.3 ± 0.1	NM_131399
			R- CCTTCCTCACCTGCTCGATCATCTT
	sfrp1a	secreted frizzled-related protein 1a	F- GATACTTCCACCTCCGAACCC	151	101.5	0.999	79.82 ± 0.1	NM_205585
			R- GATCCATGTTCTCCCGCTTG
	shha	sonic hedgehog a	F- GGGAGCGGACAGGCTCAT	77	91.9	0.998	78.61 ± 0.1	NM_131063
			R- GCCAGTGGTTCATTACAGAGATGG
	shhb	sonic hedgehog b	F- AAGCCCACATACACTGCTCTGTC	86	95.4	0.998	77.33 ± 0.1	NM_131199
			R- TGTCACCGTCCCAGACCC
	sox9b	SRY (sex determining region Y)-box 9b	F- GAGTCTGAAGATGGAGAGCAGACG	157	93.4	0.999	78.9 ± 0.4	NM_131644
			R- TAGGGGTGGTGGGTGGTGTG
	sparc	osteonectin	F- CCCTGCAAATACATCGCTCC	163	92.6	0.999	80.4 ± 0.2	NM_001001942
			R- TCTCGTAAATCTTCTTCACCCTGAG
	spp1	secreted phosphoprotein 1 (osteopontin)	F- CCTTCACCATACAAATCCTACAGCAG	153	98.4	0.993	79.82 ± 0.1	NM_001002308
			R- CCCGTCCTCCAGATCATGTACCT
	timp2a	tissue inhibitor of metalloproteinase 2	F- ATCTCATCTCAGGCAAGGCG	168	90.8	0.998	81.49 ± 0.2	NM_182874
			R- TCTCGCATGGGAAGGTTGC
	(*) R2, correlation coefficient of the slope of the standard curve.
	qPCR Primer sequences and information about esr1 co-expressed genes.
	Gene	Description	Primer Sequence (5’- 3’)	Product Size (bp)	Efficiency (E %)	R2 *	Melting Temperature (°C)	Accession ID
	cpn1	carboxypeptidase N, polypeptide 1	F- GATGAAGGAATCACAAACGGAGCCA	83	90.7	0.986	78.4 ± 0.1	NM_212770
			R- AAGCAGTTCGTGTGGAGGTAGTT
	cyr61	cysteine-rich, angiogenic inducer, 61	F-CAGTCTCCACACACCAGCCT	149	97.5	0.994	82.3 ± 0.1	NM_001001826
			R-CAGCAGCGTCCGTCCACG
	ddx21	DEAD (Asp-Glu-Ala-Asp) box helicase 21	F-AAGCCGAGAGAGACCACCTGA	86	93.6	0.998	79.9 ± 0.2	NM_001127335
			R-CTGCTGCTCCTTCAGCTTCTTCT
	dnajc3	DnaJ homolog, subfamily C, member 3	F- GGACTTCACGTCGGCAAGG	110	101.3	0.993	85.9 ± 0.3	NM_199610
			R- TGCTGCTTGGGTTTGATTTGAGCA
	lman1	lectin, mannose-binding, 1	F- AGTGGAACGGCGTGGGAAT	73	104.5	0.99	81.1 ± 0.1	XM_683569
			R- ACCAGGACAGCAGGGTTGT
	nr5a2	nuclear receptor subfamily 5, group A, member 2	F-GGGGCAACAGGTGGATTACG	107	101.5	0.996	81.7 ± 0.2	NM_001313729
			R-GCTGGAGGGATCGCAGTTTG
	rrbp1a	ribosome binding protein 1 homolog a	F- GCCAGTGAAGGCAGAAGAGTCT	118	91.5	0.991	82.15 ± 0.1	NM_001145555
			R- GGGCAGATACAGTGGACTGTCTG
	sec61a1	Sec61 translocon alpha 1 subunit	F-ACAGACAGAACCTGCCTAACCTCA	90	102.2	0.999	79.3 ± 0.1	NM_153659
			R-GATCAACTCTGAAGCCCTGGAAGT
	ssr1	signal sequence receptor, alpha	F- GAGAACACTGAGCTGACGGAAGAG	93	95.3	0.99	77.66 ± 0.1	NM_201327
			R- GATGGTTGTGTCTGCGTTGGG
	tram1	translocation associated membrane 1	F- AGCCTACGCTCTGAATCTGAACC	121	90.8	0.985	86.76 ± 0.6	NM_153669
			R- CCCACTCTGCCTTTCCTCATTGC
	xbp1	X-box binding protein 1	F-AGCAGTCCCCAAATCTGAAGACTTC	81	97.9	0.987	76.66 ± 0.2	NM_131874
			R-CCAAGCAGGAGATCAGACTCAGAGTC
	(*) R2, correlation coefficient of the slope of the standard curve.
