# Supplementary material for: Investigation of the effects of estrogen on skeletal gene expression during zebrafish larval head development
Source: PeerJ. 2016 Mar 31;4:e1878. doi: 10.7717/peerj.1878 (PMC4824909; doi:10.7717/peerj.1878)
Supplement: Table S2 — A list of genes coexpressed with esr1 in zebrafish was retrieved from COXPRESdb after they were filtered by setting the mutual rank (MR) to the top-ranked 2000 and the Supportability score of minimum 1. The expression pattern of the genes during craniofacial skeletal development was checked in a zebrafish database for gene expression (ZFIN.org). [file peerj-04-1878-s005.xlsx]

## Sheet: Table S2
		The list of genes coexpressed with esr1 in zebrafish were retrieved using COXPRESdb.
		The genes were filtered by setting the mutual rank (MR) to the top-ranked 2000 and the Supportability score of minimum 1.
		* The column "craniofacial expression" indicates characterized craniofacial expression submitted to zebrafish database (ZFIN.org)
		Gene	Function	Entrez Gene ID	Supportability	MR for esr1	Craniofacial expression *
		rrbp1a	ribosome binding protein 1 homolog a (dog)	553448	2	141.6	Yes
		cyr61	zgc:85866	403033	1	334.1	Yes
		ddx21	DEAD (Asp-Glu-Ala-Asp) box helicase 21	799650	1	335.9	Yes
		xbp1	X-box binding protein 1	140614	2	418.2	Yes
		lman1	lectin, mannose-binding, 1	559775	1	440.7	Yes
		sec61a1	Sec61 alpha 1 subunit (S. cerevisiae)	192298	1	510	Yes
		ssr1	signal sequence receptor, alpha	373100	1	726.9	Yes
		nr5a2	nuclear receptor subfamily 5, group A, member 2	30749	1	779.2	Yes
		cpn1	carboxypeptidase N, polypeptide 1	337172	1	844.7	Yes
		dnajc3a	DnaJ (Hsp40) homolog, subfamily C, member 3a	322544	1	892.9	Yes
		tram1	translocation associated membrane protein 1	266757	1	1036.9	Yes
		hdlbpa	high density lipoprotein binding protein a	794178	1	1116.5	Yes
		prdx4	peroxiredoxin 4	570477	1	1134.9	No
		krtcap2	keratinocyte associated protein 2	751643	2	1770	No
		ssr4	signal sequence receptor, delta	326701	2	1988.7	No
		cyp2k6	cytochrome P450, family 2, subfamily K, polypeptide 6	393481	1	3	No
		dap	death-associated protein	58093	1	40.8	No
		lipca	lipase, hepatic a	393997	2	44.5	No
		rtn1a	reticulon 1a	323706	1	48.2	No
		mcfd2	multiple coagulation factor deficiency 2	449676	1	71.8	No
		zgc:92249	zgc:92249	436896	2	151	No
		tie1	endothelium-specific receptor tyrosine kinase 1	30746	1	161.2	No
		rpl21	ribosomal protein L21	336568	3	191.6	No
		snd1	staphylococcal nuclease and tudor domain containing 1	324404	1	197.7	No
		nkx2.5	NK2 homeobox 5	30696	1	204.9	No
		tbx20	T-box 20	57936	1	227.6	No
		hsd17b4	hydroxysteroid (17-beta) dehydrogenase 4	393105	1	232.9	No
		f9a	coagulation factor IXa	359826	1	238	No
		brd4	bromodomain containing 4	570531	1	259.7	No
		erg	v-ets avian erythroblastosis virus E26 oncogene homolog	494073	1	285	No
		si:dkey-52d15.2	si:dkey-52d15.2	100006993	1	290.4	No
		spry2	sprouty homolog 2	335098	1	300.8	No
		hoxd3a	homeobox D3a	30349	1	306.6	No
		kmo	kynurenine 3-monooxygenase	368242	1	360.4	No
		ahsg1	alpha-2-HS-glycoprotein 1	569558	2	383.6	No
		iars	isoleucyl-tRNA synthetase	334393	1	398.9	No
		rbm46	RNA binding motif protein 46	566042	1	401.7	No
		ssr2	signal sequence receptor, beta	83414	2	403.9	No
		gck	glucokinase (hexokinase 4)	751668	1	404.4	No
		proca	protein C (inactivator of coagulation factors Va and VIIIa), a	393327	2	423	No
		eltd1	EGF, latrophilin and seven transmembrane domain containing 1	406676	1	429.4	No
		masp2	mannan-binding lectin serine peptidase 2	560277	2	430.3	No
		rad18	RAD18 E3 ubiquitin protein ligase	393106	1	441.6	No
		tek	TEK tyrosine kinase, endothelial	30747	1	463.6	No
		actn2b	actinin, alpha 2b	641575	1	480	No
		si:dkey-208b23.5	si:dkey-208b23.5	561115	1	483.2	No
		mastl	microtubule associated serine/threonine kinase-like	445215	1	486.1	No
		tnnc1a	troponin C type 1a (slow)	353247	1	501	No
		cyp2k19	cytochrome P450, family 2, subfamily k, polypeptide 19	562304	1	511	No
		filip1b	filamin A interacting protein 1b	557376	1	514.1	No
		zp3a.1	zona pellucida glycoprotein 3a, tandem duplicate 1	407714	2	532.1	No
		nucb2b	nucleobindin 2b	326050	2	551.3	No
		cct2	chaperonin containing TCP1, subunit 2 (beta)	192326	2	559.9	No
		spata17	spermatogenesis associated 17	799739	1	572.1	No
		zp3.1	zona pellucida glycoprotein 3.1	100007710	1	620.4	No
		gtpbp4	GTP binding protein 4	334050	1	646.2	No
		angptl3	angiopoietin-like 3	114421	1	648	No
		rpl22l1	ribosomal protein L22-like 1	735250	3	666.6	No
		si:zfos-411a11.2	si:zfos-411a11.2	100000156	1	674.5	No
		dbh	dopamine beta-hydroxylase (dopamine beta-monooxygenase)	30505	1	691.3	No
		ugt2a1	UDP glucuronosyltransferase 2 family, polypeptide A1	100006320	1	696.6	No
		gltscr2	glioma tumor suppressor candidate region gene 2	322404	1	728.1	No
		fas	Fas cell surface death receptor	768248	1	773.5	No
		dhx37	DEAH (Asp-Glu-Ala-His) box polypeptide 37	100009635	1	778.4	No
		traip	TRAF-interacting protein	402900	1	780.6	No
		ccdc146	coiled-coil domain containing 146	767671	1	786.8	No
		ccdc83	coiled-coil domain containing 83	100004068	1	806.1	No
		itih3a	inter-alpha-trypsin inhibitor heavy chain 3a	553614	3	810.4	No
		cga	glycoprotein hormones, alpha polypeptide	402987	1	814.2	No
		zgc:163025	zgc:163025	100038778	2	814.8	No
		hoxa1a	homeobox A1a	58051	1	828.8	No
		fli1a	Fli-1 proto-oncogene, ETS transcription factor a	30619	1	833.2	No
		c8g	complement component 8, gamma polypeptide	393837	2	839.2	No
		kif4	kinesin family member 4	393796	1	840.7	No
		cav1	caveolin 1	323695	2	841.5	No
		tmed10	transmembrane emp24-like trafficking protein 10 (yeast)	326716	3	852.7	No
		dub	duboraya	566846	1	856.6	No
		dzip1l	DAZ interacting zinc finger protein 1-like	553313	1	865.5	No
		slc2a2	solute carrier family 2 (facilitated glucose transporter), member 2	322493	1	880.6	No
		cdkn3	cyclin-dependent kinase inhibitor 3	402796	2	882.9	No
		prkcsh	protein kinase C substrate 80K-H	394028	2	888.2	No
		tat	tyrosine aminotransferase	561410	2	895.1	No
		spint1b	serine peptidase inhibitor, Kunitz type 1 b	797346	1	899.6	No
		si:ch211-272n13.3	si:ch211-272n13.3	402845	1	910	No
		eif3ea	eukaryotic translation initiation factor 3, subunit E, a	325102	2	926.5	No
		mettl13	methyltransferase like 13	557908	1	939.4	No
		bfb	complement component bfb	30489	1	944	No
		her8a	hairy-related 8a	323656	1	959.4	No
		tbx15	T-box 15	246222	1	968.2	No
		rsl24d1	ribosomal L24 domain containing 1	406266	1	976.7	No
		actc1b	actin, alpha, cardiac muscle 1b	58114	2	978	No
		chpt1	choline phosphotransferase 1	322605	1	982.2	No
		zar1	zygote arrest 1	369189	1	983.3	No
		shbg	sex hormone-binding globulin	322604	1	988.7	No
		egln3	egl-9 family hypoxia-inducible factor 3	406602	1	988.8	No
		nsa2	NSA2 ribosome biogenesis homolog (S. cerevisiae)	321769	1	1016.6	No
		fads2	fatty acid desaturase 2	140615	1	1024.8	No
		ssr3	signal sequence receptor, gamma	337190	3	1033.5	No
		si:dkey-88l16.3	si:dkey-88l16.3	796880	1	1034.8	No
		c3a.1	complement component c3a, duplicate 1	321046	3	1035.8	No
		pih1d2	PIH1 domain containing 2	494086	1	1037.5	No
		rdh1	retinol dehydrogenase 1	378440	1	1045.7	No
		ttpa	tocopherol (alpha) transfer protein	325906	1	1045.7	No
		rrad	Ras-related associated with diabetes	327396	1	1061.1	No
		dio1	deiodinase, iodothyronine, type I	799937	1	1063	No
		ccdc79	coiled-coil domain containing 79	559140	1	1070.8	No
		slc22a2	solute carrier family 22 (organic cation transporter), member 2	406424	1	1072.4	No
		slc31a1	solute carrier family 31 (copper transporter), member 1	403028	1	1077.9	No
		sf3b4	splicing factor 3b, subunit 4	192318	1	1079.8	No
		zgc:112265	zgc:112265	100003906	2	1086	No
		serpinf2a	serpin peptidase inhibitor, clade F (alpha-2 antiplasmin, pigment epithelium derived factor), member 2a	560308	2	1088.6	No
		fabp10a	fatty acid binding protein 10a, liver basic	171481	1	1088.9	No
		ncaph	non-SMC condensin I complex, subunit H	570062	2	1091.2	No
		si:ch211-81a5.5	si:ch211-81a5.5	558774	1	1095.3	No
		zgc:162969	zgc:162969	565767	1	1095.5	No
		chchd4	coiled-coil-helix-coiled-coil-helix domain containing 4	445144	1	1111.3	No
		cyb5d1	cytochrome b5 domain containing 1	795592	1	1112	No
		zp3a.2	zona pellucida glycoprotein 3a, tandem duplicate 2	558677	1	1113.2	No
		flt4	fms-related tyrosine kinase 4	30121	1	1122.2	No
		olig3	oligodendrocyte transcription factor 3	566728	1	1126.4	No
		serping1	serpin peptidase inhibitor, clade G (C1 inhibitor), member 1	567801	1	1127	No
		pth1rb	parathyroid hormone 1 receptor b	30651	1	1131.5	No
		a2ml	alpha-2-macroglobulin-like	100006972	1	1133.6	No
		acad11	acyl-CoA dehydrogenase family, member 11	393147	1	1140	No
		eif2s1b	eukaryotic translation initiation factor 2, subunit 1 alpha b	321564	1	1150.6	No
		tnnt2a	troponin T type 2a (cardiac)	58071	2	1168.3	No
		agt	angiotensinogen	322485	2	1168.7	No
		dusp6	dual specificity phosphatase 6	353314	1	1169.7	No
		tdo2a	tryptophan 2,3-dioxygenase a	100008541	1	1170.6	No
		hoxc11b	homeobox C11b	570925	1	1176.2	No
		ybx1	Y box binding protein 1	795398	1	1176.9	No
		hhex	hematopoietically expressed homeobox	30098	1	1177.4	No
		LOC798191	tumor necrosis factor receptor superfamily member 14-like	798191	1	1184.5	No
		hsp90ab1	heat shock protein 90, alpha (cytosolic), class B member 1	30573	1	1199.7	No
		rps17	ribosomal protein S17	393818	3	1214.9	No
		rnf32	ring finger protein 32	768120	1	1219.1	No
		pdia3	protein disulfide isomerase family A, member 3	378851	3	1226.5	No
		hoxc8a	homeobox C8a	449648	1	1238	No
		fam183a	family with sequence similarity 183, member A	792834	1	1242.2	No
		mcph1	microcephalin 1	678616	1	1244.6	No
		rsph14	radial spoke head 14 homolog (Chlamydomonas)	553388	1	1250.2	No
		zgc:92868	zgc:92868	445040	3	1271.9	No
		hoxa10b	homeobox A10b	30391	3	1277.4	No
		zgc:172182	zgc:172182	100136847	1	1280.3	No
		btg4	B-cell translocation gene 4	378946	1	1281.3	No
		ddx51	DEAD (Asp-Glu-Ala-Asp) box polypeptide 51	445387	1	1287.8	No
		eef1b2	eukaryotic translation elongation factor 1 beta 2	335370	3	1308.7	No
		hpx	hemopexin	327588	2	1316.4	No
		sec61al2	Sec61 alpha like 2	266796	2	1327.3	No
		pklr	pyruvate kinase, liver and RBC	114551	1	1338.3	No
		copg2	coatomer protein complex, subunit gamma 2	30187	1	1339.3	No
		cdon	cell adhesion associated, oncogene regulated	280652	1	1347.7	No
		tmed3	transmembrane emp24 protein transport domain containing 3	336391	1	1350.8	No
		cc2d2a	coiled-coil and C2 domain containing 2A	570250	1	1351	No
		srpr	signal recognition particle receptor (docking protein)	569063	2	1361.1	No
		cdkl1	cyclin-dependent kinase-like 1 (CDC2-related kinase)	445316	1	1362.9	No
		itga2b	integrin, alpha 2b	445380	1	1370.1	No
		eif3m	eukaryotic translation initiation factor 3, subunit M	334626	3	1387.8	No
		zgc:66455	zgc:66455	393502	1	1390.3	No
		scaf4a	SR-related CTD-associated factor 4a	567501	1	1392.3	No
		aars	alanyl-tRNA synthetase	324940	1	1406	No
		tshb	thyroid stimulating hormone, beta subunit	353223	1	1407.4	No
		sptb	spectrin, beta, erythrocytic	58040	1	1407.8	No
		rpl24	ribosomal protein L24	192301	3	1411.9	No
		eef1g	eukaryotic translation elongation factor 1 gamma	195822	3	1428	No
		ambp	alpha-1-microglobulin/bikunin precursor	394093	3	1429	No
		tcf7l1a	transcription factor 7-like 1a (T-cell specific, HMG-box)	30523	1	1431.5	No
		alox5ap	arachidonate 5-lipoxygenase-activating protein	337376	2	1433.9	No
		itm2ba	integral membrane protein 2Ba	323632	1	1436.2	No
		si:dkey-16i5.10	si:dkey-16i5.10	563247	1	1442.1	No
		gata6	GATA binding protein 6	58076	1	1443.5	No
		kpna7	karyopherin alpha 7 (importin alpha 8)	406343	1	1451.5	No
		rps27.1	ribosomal protein S27, isoform 1	554155	3	1451.8	No
		naf1	nuclear assembly factor 1 homolog (S. cerevisiae)	568328	1	1453.8	No
		ccdc103	coiled-coil domain containing 103	437026	1	1456.2	No
		srd5a2a	steroid-5-alpha-reductase, alpha polypeptide 2a	550398	1	1461.6	No
		shcbp1	SHC SH2-domain binding protein 1	333933	2	1462.8	No
		si:ch1073-126c3.2	si:ch1073-126c3.2	555816	1	1473.4	No
		cmlc1	cardiac myosin light chain-1	64671	2	1484.1	No
		btg1	B-cell translocation gene 1	114432	1	1485.7	No
		dnaaf1	dynein, axonemal, assembly factor 1	386722	1	1491.6	No
		vars	valyl-tRNA synthetase	114427	2	1498.4	No
		opn1lw1	opsin 1 (cone pigments), long-wave-sensitive, 1	30413	1	1501.9	No
		agxta	alanine-glyoxylate aminotransferase a	436603	2	1505.4	No
		prph	peripherin	30259	1	1513.6	No
		clptm1l	CLPTM1-like	436653	1	1519.4	No
		plg	plasminogen	322691	3	1521.4	No
		scp2a	sterol carrier protein 2a	393839	1	1523.9	No
		gcga	glucagon a	494052	2	1527	No
		si:dkey-91f15.6	si:dkey-91f15.6	564304	1	1529.7	No
		hk1	hexokinase 1	406791	1	1544.6	No
		prph2b	peripherin 2b (retinal degeneration, slow)	559209	2	1548	No
		admp	anti-dorsalizing morphogenic protein	140619	1	1564	No
		ccnb1	cyclin B1	58025	2	1569.4	No
		spata4	spermatogenesis associated 4	445563	2	1569.9	No
		hoxb8a	homeobox B8a	30343	2	1574	No
		h1m	linker histone H1M	327403	1	1575.4	No
		ccnb2	cyclin B2	368316	1	1593	No
		pdca	phosducin a	386613	2	1612.6	No
		eef1db	eukaryotic translation elongation factor 1 delta b (guanine nucleotide exchange protein)	560745	3	1615.4	No
		rpl23a	ribosomal protein L23a	335539	3	1619.8	No
		fscn2b	fascin actin-bundling protein 2b, retinal	393743	2	1620.4	No
		lmo7a	LIM domain 7a	553341	1	1623.2	No
		sox2	SRY (sex determining region Y)-box 2	378723	1	1624.3	No
		nme8	NME/NM23 family member 8	100037319	1	1625.1	No
		rps12	ribosomal protein S12	337007	3	1633	No
		dok2	docking protein 2	100001537	1	1635.4	No
		zgc:92590	zgc:92590	474322	1	1652.7	No
		eif3f	eukaryotic translation initiation factor 3, subunit F	557270	2	1657.7	No
		mrpl32	mitochondrial ribosomal protein L32	751730	1	1663	No
		ndufb6	NADH dehydrogenase (ubiquinone) 1 beta subcomplex, 6	393781	3	1668.5	No
		rpl27a	ribosomal protein L27a	336726	3	1672.1	No
		ccdc37	coiled-coil domain containing 37	767793	1	1674.7	No
		ehf	ets homologous factor	568223	1	1675.2	No
		dna2	DNA replication helicase/nuclease 2	559535	1	1677.2	No
		foxa3	forkhead box A3	30559	1	1677.7	No
		asns	asparagine synthetase	394138	1	1685	No
		rpl14	ribosomal protein L14	323365	3	1685.4	No
		rps27.2	ribosomal protein S27, isoform 2	393738	3	1685.9	No
		ralgapa1	Ral GTPase activating protein, alpha subunit 1 (catalytic)	556427	1	1687.3	No
		hoxb7a	homeobox B7a	58044	2	1688.7	No
		pabpc1l	poly(A) binding protein, cytoplasmic 1-like	327625	1	1700	No
		cep128	centrosomal protein 128	100037385	1	1700.8	No
		cfhl4	complement factor H like 4	559122	2	1710.7	No
		xirp1	xin actin-binding repeat containing 1	497637	2	1715.7	No
		ttc25	tetratricopeptide repeat domain 25	393286	1	1717.5	No
		retsat	retinol saturase (all-trans-retinol 13,14-reductase)	325922	3	1728.5	No
		uox	urate oxidase	436604	1	1731.7	No
		guca1b	guanylate cyclase activator 1B	140431	2	1735.5	No
		etf1b	eukaryotic translation termination factor 1b	266989	1	1737.6	No
		f13a1b	coagulation factor XIII, A1 polypeptide b	561287	1	1743.5	No
		ccdc65	coiled-coil domain containing 65	368824	1	1766.6	No
		rplp2l	ribosomal protein, large P2, like	558312	1	1768.9	No
		arid3b	AT rich interactive domain 3B (BRIGHT-like)	571249	1	1770.5	No
		igfbp1b	insulin-like growth factor binding protein 1b	793907	1	1771.6	No
		mtp	microsomal triglyceride transfer protein	406207	1	1773.8	No
		golga5	golgin A5	406720	1	1777.1	No
		birc5b	baculoviral IAP repeat containing 5b	246726	1	1780	No
		570872	&nbsp;	570872	1	1787.3	No
		rps20	ribosomal protein S20	406485	3	1789.2	No
		si:dkey-25o16.4	si:dkey-25o16.4	567619	3	1790.6	No
		upp2	uridine phosphorylase 2	393113	2	1803.5	No
		bmp6	bone morphogenetic protein 6	503761	1	1808.3	No
		smg7	SMG7 nonsense mediated mRNA decay factor	565575	1	1809.4	No
		mos	v-mos Moloney murine sarcoma viral oncogene homolog	795517	1	1812	No
		ftcd	formimidoyltransferase cyclodeaminase	394052	2	1819.5	No
		lhx8a	LIM homeobox 8a	378959	1	1821.1	No
		r3hdm1	R3H domain containing 1	560062	1	1821.9	No
		ush1c	Usher syndrome 1C (autosomal recessive, severe)	564412	1	1822.5	No
		fam228a	family with sequence similarity 228, member A	569576	1	1823.7	No
		steap4	STEAP family member 4	550429	1	1826.8	No
		alg2	asparagine-linked glycosylation 2 (alpha-1,3-mannosyltransferase)	403068	1	1834.6	No
		lrtomt	leucine rich transmembrane and O-methyltransferase domain containing	767801	1	1837.6	No
		rcn3	reticulocalbin 3, EF-hand calcium binding domain	415248	1	1839.8	No
		sycp3	synaptonemal complex protein 3	678602	1	1840.6	No
		cyp2p8	cytochrome P450, family 2, subfamily P, polypeptide 8	100034366	1	1847.5	No
		dad1	defender against cell death 1	566527	2	1854.8	No
		adad1	adenosine deaminase domain containing 1 (testis-specific)	564818	1	1856.8	No
		gpat2	glycerol-3-phosphate acyltransferase 2, mitochondrial	558437	1	1866.6	No
		fga	fibrinogen alpha chain	378986	3	1866.9	No
		si:dkey-105h12.2	si:dkey-105h12.2	100006782	1	1870.1	No
		nfe2	nuclear factor, erythroid 2	317765	1	1870.9	No
		rps3a	ribosomal protein S3A	337240	3	1872.3	No
		cpa1	carboxypeptidase A1 (pancreatic)	325886	3	1876.7	No
		rpl5b	ribosomal protein L5b	415196	3	1878.2	No
		zar1l	zygote arrest 1-like	561189	1	1882.6	No
		mst1	macrophage stimulating 1 (hepatocyte growth factor-like)	259260	2	1883.9	No
		LOC563749	zinc finger protein 638-like	563749	1	1891.1	No
		rsph9	radial spoke head 9 homolog	558005	2	1898.8	No
		ipo7	importin 7	321739	1	1906.3	No
		LOC100006586	novel NACHT domain containing protein	100006586	1	1908.8	No
		piwil1	piwi-like RNA-mediated gene silencing 1	368200	2	1916.7	No
		rps26	ribosomal protein S26	336662	3	1920.2	No
		hm13	histocompatibility (minor) 13	259190	1	1920.9	No
		eif3i	eukaryotic translation initiation factor 3, subunit I	406263	2	1922.2	No
		eef2b	eukaryotic translation elongation factor 2b	326929	1	1922.3	No
		efhb	EF-hand domain family, member B	571184	1	1924.7	No
		LOC100006895	alpha-2-macroglobulin-like	100006895	1	1933.5	No
		rpl36a	ribosomal protein L36A	195819	3	1944.4	No
		sec61g	Sec61 gamma subunit	436772	2	1949.7	No
		zmynd10	zinc finger, MYND-type containing 10	393368	1	1950.2	No
		tmem237b	transmembrane protein 237b	447898	1	1958.5	No
		mibp2	muscle-specific beta 1 integrin binding protein 2	386710	1	1962	No
		erich3	glutamate-rich 3	797289	1	1964.9	No
		kif18a	kinesin family member 18A	393209	1	1966.1	No
		serpinc1	serpin peptidase inhibitor, clade C (antithrombin), member 1	321545	3	1970.6	No
		etaa1	Ewing tumor-associated antigen 1	558278	1	1974.7	No
		rpl39	ribosomal protein L39	415168	3	1977.7	No
		asz1	ankyrin repeat, SAM and basic leucine zipper domain containing 1	572911	1	1990.3	No
		rpn1	ribophorin I	325561	2	1991.3	No
		rpl5a	ribosomal protein L5a	326961	3	1992.8	No
		sult3st1	sulfotransferase family 3, cytosolic sulfotransferase 1	558790	1	1995	No
		igfals	insulin-like growth factor binding protein, acid labile subunit	570758	1	1997.7	No
		cp	ceruloplasmin	84702	3	2001.7	No
		ttna	titin a	317731	2	2003.5	No
		vtnb	vitronectin b	403026	2	2004.3	No
		pih1d3	PIH1 domain containing 3	432386	2	2006.4	No
		bmp15	bone morphogenetic protein 15	334183	1	2008.9	No
		tonsl	tonsoku-like, DNA repair protein	492655	1	2009.3	No
		zgc:92591	zgc:92591	436997	2	2011.5	No
		tnni2a.3	troponin I type 2a (skeletal, fast), tandem duplicate 3	402809	3	2018.4	No
		dyx1c1	dyslexia susceptibility 1 candidate 1	402988	1	2018.5	No
		arl11	ADP-ribosylation factor-like 11	324689	1	2020.3	No
		eif3ba	eukaryotic translation initiation factor 3, subunit Ba	796380	1	2022.2	No
		im:6908224	im:6908224	571648	1	2025.7	No
		psmc1b	proteasome (prosome, macropain) 26S subunit, ATPase, 1b	415181	1	2028.1	No
		ech1	enoyl CoA hydratase 1, peroxisomal	450048	2	2029	No
		cdc7	cell division cycle 7 homolog (S. cerevisiae)	492768	1	2030.3	No
		caprin1b	cell cycle associated protein 1b	406341	1	2033.5	No
		pum1	pumilio RNA-binding family member 1	394176	1	2037	No
		cfb	complement factor B	30604	2	2038.4	No
		dlec1	deleted in lung and esophageal cancer 1	555583	1	2039.3	No
		diexf	digestive organ expansion factor homolog	286787	1	2042.9	No
		pus7	pseudouridylate synthase 7 (putative)	402995	1	2043.3	No
		rps26l	ribosomal protein S26, like	393715	3	2062.4	No
		rpusd4	RNA pseudouridylate synthase domain containing 4	445101	1	2066.7	No
		agmo	alkylglycerol monooxygenase	405819	1	2067.1	No
		adh5	alcohol dehydrogenase 5	116517	1	2074.1	No
		tsga10	testis specific, 10	768146	1	2083.6	No
		eno4	enolase family member 4	558487	1	2092	No
		rps8a	ribosomal protein S8a	407690	2	2100	No
		myl7	myosin, light chain 7, regulatory	30592	2	2100.9	No
		ubxn10	UBX domain protein 10	751736	1	2102.1	No
		ddrgk1	DDRGK domain containing 1	393263	1	2110.8	No
		rpl11	ribosomal protein L11	415229	3	2112.3	No
		si:ch211-199o1.2	si:ch211-199o1.2	798846	1	2114.5	No
		boc	BOC cell adhesion associated, oncogene regulated	334628	1	2118.7	No
		rrbp1b	ribosome binding protein 1 homolog b (dog)	567029	1	2126	No
		tfa	transferrin-a	30255	2	2134.3	No
		ppp1r42	protein phosphatase 1, regulatory subunit 42	431749	1	2136.3	No
		fam166b	family with sequence similarity 166, member B	100009651	1	2136.5	No
		dazl	deleted in azoospermia-like	58039	1	2136.9	No
		gosr2	golgi SNAP receptor complex member 2	324569	1	2142.4	No
		ankmy1	ankyrin repeat and MYND domain containing 1	568987	1	2143.9	No
		rpl10a	ribosomal protein L10a	323305	3	2146.8	No
		sncgb	synuclein, gamma b (breast cancer-specific protein 1)	553679	1	2147	No
		msmo1	methylsterol monooxygenase 1	406662	2	2148.7	No
		rps9	ribosomal protein S9	114420	3	2149.5	No
		pdcd2l	programmed cell death 2-like	393192	1	2154	No
